1           A novel polyphasic identification system for genus *Trichoderma*

2

3   Kai Dou<sup>abc</sup>, Zhixiang Lu<sup>abc</sup>, Qiong Wu<sup>ad</sup>, Mi Ni<sup>d</sup>, Chuanjin Yu<sup>e</sup>, Meng Wang<sup>abc</sup>, Yaqian  
4   Li<sup>abc</sup>, Xinhua Wang<sup>abc</sup>, Huilan Xie<sup>f</sup>, Jie Chen<sup>abc\*</sup>

5

6   **a** School of Agriculture and Biology, Shanghai Jiao Tong University, Shanghai, P.R.  
7   China.

8   **b** State Key Laboratory of Microbial Metabolism, Shanghai Jiao Tong University,  
9   Shanghai, P.R. China.

10   **c** Key Laboratory of Urban Agriculture (South), Ministry of Agriculture, Shanghai,  
11   P.R. China.

12   **d** Anhui Province Key Laboratory of Embryo Development and Reproductive Regu-  
13   lation, Anhui Province Key Laboratory of Environmental Hormone and Reproduction,  
14   Fuyang Normal University.

15   **e** The International Peace Maternity and Child Health Hospital, School of Medicine,  
16   Shanghai Jiao Tong University, Shanghai, P.R. China.

17   **f** Shanghai Personal Biotechnology Co., Ltd.

18

19   \*for correspondence: jiechen59@sjtu.edu.cn

20

21   **Abstract**

22       As the rapid-changing in *Trichoderma* taxonomy, an efficient identification of  
23   *Trichoderma* species is an urgent issue for *Trichoderma*-based research. In this study,  
24   based on the current taxonomy of *Trichoderma*, we constructed curated databases in-  
25   cluding 338 ITS sequences, 435 TEF1 sequences, 415 RPB2 sequences and 28 phe-  
26   notypic characters. In addition, a polyphasic identification system (PIST) was devel-  
27   oped. Within PIST, the resolution ability of molecular and phenotype characters could  
28   be combined for species identification in a step-by-step way. Compared with other  
29   identification systems, the involved *Trichoderma* species were extended from 88 to  
30   252 species and 175 from 188 tested *Trichoderma* species could be identified within  
31   PIST. In most tested cases, three nucleotide markers and phenotypic characters  
32   showed improved identification performance. The TEF1 sequences have superior res-  
33   olution than other characters.

34

35   **Importance**

36       The genus *Trichoderma* is important to human society with a wide application in  
37   industry, agriculture and environment bio-remediation. Thus, a quick and accurate  
38   identification of *Trichoderma* spp. is paramount since it is usually the first step to

39 conduct a *Trichoderma*-based scientific research and is an obstruction especially for  
40 those researchers as nematologist, chemists, nutritionist and the like, lacking of taxo-  
41 nomic knowledge of fungi.

42

## 43 **Introduction**

44 The genus *Trichoderma* as a large group of microorganisms worldwide contains  
45 kinds of opportunistic fungi with economically and ecologically importance to human  
46 society. *Trichoderma* spp. has already been used for a long time in industrial enzyme  
47 production (C. et al, 2004; de Azevedo et al, 2000; Toyama et al, 2002), as biocontrol  
48 agents in biofertilizer and biopesticide (Contreras-Cornejo et al, 2009; Harman et al,  
49 2004) or as bio-remediation agents for heavy metal and xenobiotic contamination  
50 (Tripathi et al, 2013; Zhang et al, 2018b). In addition, *Trichoderma* spp. is also em-  
51 ployed to be an expression system for the production of heterologous proteins (Zhang  
52 et al, 2018a) and improve the feed nutrition for domestic animals (AlZahal et al,  
53 2017). As scientific and practical values have continuously been explored, the studies  
54 involving *Trichoderma* spp. have been weaving through a variety of research fields  
55 and showing sustainable growth (Fig 1 and 2). Thus, accurate identification of  
56 *Trichoderma* spp. is paramount since it is usually the first step to conduct a scientific  
57 research and is an obstruction especially for those researchers as nematologist, chem-  
58 ists, nutritionist and the like, lacking of taxonomic knowledge of fungi.

59 In order to reduce the barrier standing between non-taxonomic researchers and  
60 *Trichoderma*-based researches, *Trichoderma* taxonomists have developed a series of  
61 identification tools. Samuels and colleagues collected and catalogued phenotypic  
62 characters of *Trichoderma* spp. to create an interactive key  
63 (<http://nt.ars-grin.gov/taxadescriptions/keys/TrichodermaIndex.cfm>, not available  
64 currently) for species identification. Although the interactive key makes comparison  
65 of different phenotypic characters convenient by avoiding referencing to protologue  
66 of each species, phenotype-based identification has inherent defects. For instance, the  
67 culture appearance of *Trichoderma* spp. is very susceptible to environmental factors  
68 without strict control, leading to difficulty to distinguish those phenotypic traits be-  
69 tween species based on classical taxon system. The scenario result inevitably in the  
70 determination of phenotypic characters based on subjective judgement and homopasy  
71 characters of other species. What is more, the description of new *Trichoderma* spp. is  
72 rely heavily on DNA-based methods (Chen & Zhuang, 2017; Jaklitsch & Voglmayr,  
73 2015a). These defects, not only exist in *Trichoderma* identification but commonly in  
74 fungi, make it difficult for a quick and accurate identification in species level even for  
75 experts.

76 To make some improvements, DNA barcoding, originally for species diagnosis in  
77 the animals (Hebert et al, 2003a; Hebert et al, 2003b), was introduced in *Trichoderma*  
78 identification by Druzhinina et al. and integrated with a program namely *TrichOkey*  
79 (Druzhinina et al, 2005). The original version of *TrichOKey* made use of several spe-  
80 cies-, clade- and genus-specific oligonucleotides sequences (named as hallmarks) de-

81 rived from ITS (nuclear ribosomal internal transcribed spacer) region for a quick  
82 identification of 75 single species, 5 species pairs and 1 species triplet (Druzhinina et  
83 al, 2005). A more reliable version allowing simultaneous identification of multiple  
84 ITS sequences is in currently using (Druzhinina & Kopchinskiy, 2006) although the  
85 ITS region was currently considered to be insufficient for *Trichoderma* identification  
86 (Raja et al, 2017). Another identification tool box, *TrichoBLAST*, for *Trichoderma*  
87 identification had also been developed, which is a combination of a multilocus data-  
88 base of phylogenetic markers (MDPM), a diagnosis program of phylogenetic markers  
89 (*TrichoMARK*) and a local BLAST server (Kopchinskiy et al, 2005). *TrichOKey* and  
90 *TrichoBLAST* are *Trichoderma*-specific identification tools and had promoted  
91 *Trichoderma*-related studies (Matarese et al, 2012; Mohamed-Benkada et al, 2006)  
92 during an earlier period with the classification system in genus *Trichoderma* contain-  
93 ing only 88 species (Kopchinskiy et al, 2005). However, the current taxonomy of  
94 *Trichoderma* has changed dramatically and a recent report listed 254 accepted  
95 *Trichoderma* names (Bissett et al, 2015) that have not been updated into the databases  
96 of *TrichOKey* and *TrichoBLAST*. Thus, there are no *Trichoderma*-specific identifica-  
97 tion tools currently applicable.

98 Apart from the mentioned identification databases, there are numerous databases  
99 with a broad diagnostic scope not only dedicate to *Trichoderma* (Thangadurai et al,  
100 2016; Yahr et al, 2016). One of the most familiar databases is Genbank (share the  
101 same nucleotide database with DDBJ and EMBL). The Genbank database contains  
102 the largest number of nucleotide sequences including multilocus barcodes. However,  
103 identification of *Trichoderma* spp., similarly to other fungi, via BLASTn program in  
104 Genbank was advised to be cautious due to the non-curated association of sequences  
105 with species name (Druzhinina et al, 2005; Nilsson et al, 2006). Aware of this issue, a  
106 curated sequence database was created especially for *Trichoderma*, referred to as  
107 RefSeq Targeted Loci database (RTL), with a joint effort between the National Center  
108 for Biotechnology Information (NCBI) and fungal taxonomy experts (Robbertse et al,  
109 2017). Besides, among the numerous curated databases involving fungi sequences, the  
110 UNITE (User-friendly Nordic ITS Ectomycorrhiza Database) (Urmas et al, 2005)  
111 could also be adopted to identify *Trichoderma* spp. within a limited number of species.  
112 For a comprehensive learning of the identification tools and databases, it is advised to  
113 refer to the latest publications (Raja et al, 2017; Thangadurai et al, 2016).

114 Taken together, the most suitable identification system currently available for  
115 *Trichoderma* is RTL-based BLASTn search due to its consistency with the up-to-date  
116 taxonomy of *Trichoderma*. Nevertheless, the RTL is mainly focused on the ITS region,  
117 which is not competent for identification at the species level of some speciose genera  
118 including *Trichoderma*. Moreover, there is no cross-referring tool at NCBI to make  
119 full use of its sequences resources efficiently for species identification. To overcome  
120 drawbacks of current taxonomic tools, a polyphasic identification system for *Tricho-*  
121 *derma* (PIST) was constructed by utilizing a comprehensive information of nucleotide  
122 markers (ITS, TEF1 and RPB2) and phenotypic characters based on the latest *Tricho-*  
123 *derma* taxonomy. PIST was run as an interactive system and is easily extended in da-  
124 tabase issue and even cover more fungi in other genus.

125

## 126 **Results**

### 127 **Outline of the web interface**

128 There are three blocks designed in the web interface currently available for users  
129 as shown in Fig 3.

130 Block 1 (Fig 3a) contains four operating zones (Z1, Z2, Z3, Z4). Zone 1 is a short  
131 description of the identification system associated with a hyperlink, and function to  
132 initialize retrieval sets in the system by a single click. Zone 2 is a drop-down list of  
133 three nucleotide markers (ITS, TEF1, RPB2), most commonly used in *Trichoderma*  
134 identification, for users to choose a nucleotide marker database. Zone 3 is a textbox  
135 for users to input a nucleotide sequence corresponding to zone 2. The input sequence  
136 was required to only contain characters representing nucleic acids without any anno-  
137 tations and titles. Zone 4 includes three textboxes for users to change parameters of  
138 the BLAST program (Altschul et al, 1990). The parameter of Identity allowed an in-  
139 put of a number from 0 to 100 (i.e. 98) representing the sequence similarity from 0%  
140 to 100%. The parameter of Expect Value allowed an input of a number in Exponential  
141 notation (i.e. 1e-6), and the parameter of Coverage allowed an input of a number from  
142 0.0 to 1.0 representing the sequence coverage from 0% to 100%. As there is no exact  
143 cutoff value of the parameter being universally competent for indicating conspecific  
144 taxa (O'Brien et al, 2005; Raja et al, 2017), the default parameters wfollowst up based  
145 on published articles as follow: 97% Identity, 80% Coverage and 1e-6 Expect Value  
146 (Nilsson et al, 2008; Raja et al, 2017).

147 Block 2 showed phenotypic characters of *Trichoderma*. It provided a specific  
148 content corresponding to a phenotypic character with a drop-down list for users to  
149 pick from.

150 Block 3 provided a submission function by a single click at the “submit” button.  
151 Subsequently, it listed candidate *Trichoderma* species that meet the users’ retrieval  
152 requirement.

153

### 154 **Identified *Trichoderma* species through nucleotide markers**

155 In this study, 87 *Trichoderma* species were accurately identified with a specific  
156 combination of nucleotide markers (ITS, TEF1, RPB2) using default parameters (Ta-  
157 ble 1). Among the 86 *Trichoderma* species, 80 species were identified with one nucle-  
158 otide marker. In detail, 66 species could be identified with TEF1, 46 species with  
159 RPB2 and 18 species with ITS. In comparison of the capability of the three nucleotide  
160 markers in differentiating species (excluding those species with partial markers), 19  
161 *Trichoderma* species were only identified with TEF1 while 2 species were identified  
162 only by RPB2 or ITS. These results were in accordance with the published opinions,  
163 ITS region was not sufficient for species identification in some highly speciose genera  
164 including *Trichoderma* (Raja et al, 2017), and TEF1 has superior resolution than ITS  
165 especially in some species complex (Chaverri et al, 2015; Stielow et al, 2015).

166 For some *Trichoderma* species, the identification could only be completed by us-

167 ing a combination of different nucleotide markers. For instance, *T. aggressivum f. eu-*  
168 *ropaeum*, *T. bissettii* and *T. silvae-virgineae* were only identified by using the combi-  
169 nation of ITS and TEF1, *T. eijii*, *T. neocrassum* and *T. pyramidale* by the combination  
170 of TEF1 and RPB2, *T. atroviride* and *T. longipile* by the combination of ITS and  
171 TEF1 or ITS and RPB2. These results reflected a supplementary effect of different  
172 nucleotide markers in *Trichoderma* identification.

173

#### 174 **Unidentified *Trichoderma* species through nucleotide markers**

175 There were 81 *Trichoderma* species with inseparable candidate species or no re-  
176 trieval result if nucleotide markers with default parameters were used for retrieving  
177 (Table 2). For instance, no result comes out when *T. afroharzianum* was retrieved by  
178 using TEF1 unless changed the parameter of Coverage to 0.5. There are 2 candidates  
179 when retrieving *T. cremeum* even based on a combination of TEF1 and RPB2. After  
180 analyzing the corresponding marker sequences of the unidentified *Trichoderma* spe-  
181 cies, several types were divided as follows:

182 (T1) Overlap region of sequences contain barcode gap

183 There were 93 sequences within this type. It was supposed that the failing of  
184 identification of *Trichoderma* species with sequences of this type due to the regional  
185 overlaps between marker sequences used for testing and database construction. Essen-  
186 tially, the regional overlap was caused by the different primer pairs employed to am-  
187 plify the nucleotide markers as there were more than one universal primer pairs de-  
188 signed for each nucleotide marker (Druzhinina & Kubicek, 2005; Liu et al, 1999;  
189 Martin & Rygiewicz, 2005a). In this case, a successful identification could be  
190 achieved by reducing the threshold of Coverage if the overlap region contained a  
191 barcode gap. A practical case showed that an accurate identification of *T. afroharzi-*  
192 *anum* succeeded by setting the Coverage of TEF1 as 0.5, however, there was no re-  
193 trieval result under the default parameters. Another failure of species identification is  
194 caused by the intraspecific variability of sequence similarity. Up to now, within  
195 *Trichoderma* species, there is no defined bound of sequence similarity for each nucle-  
196 otide marker. On this condition, a successful identification could be accomplished by  
197 adjusting the threshold of Identity (i.e. increasing the value of Identity to 100 while  
198 retrieving *T. austriacum* with ITS or decreasing that to 96 while retrieving *T.*  
199 *andinense* with TEF1). In some cases, a simultaneous adjusting of Identity and Cov-  
200 erage was needed for final identification (i.e. setting coverage as 0.6 and Identity as  
201 99 when using RPB2 for *T. americanum* identification).

202 (T2) Overlap region of sequences did not contain barcode gap

203 There are 18 sequences in this type and as much as 13 are TEF1 as it contains  
204 three regions (intron 4, intron 5 and exon 6) usually amplified by researchers  
205 (Druzhinina & Kubicek, 2005). A practical case showed that the TEF1 sequence for  
206 PIST testing from *T. citrinum* was located at intron 4 and 5, while the corresponding  
207 sequence deposited in database located at exon 6. Consequently, the two sequences  
208 were incomparable and was unable to be employed for identification of *T. citrinum*.  
209 Except for TEF1 marker, there were four RPB2 sequences from *T. parasiluliferum*, *T.*  
210 *pezizoides*, *T. pseudokoningii* and *T. pseudostramineum*, and one ITS sequence from *T.*



211 *pezizoides* shared less overlap regions with the corresponding sequences in database  
212 and were not enough for species identification.

213 (T3) Tested marker sequences showed low sequence similarity intraspecies

214 There were two tested marker sequences in this type and both are ITS markers  
215 sourced from *T. effusum* and *T. pseudostramineum* separately (Fig 4). Those sequenc-  
216 es showed an excessively low similarity with corresponding sequences deposited in  
217 databases. As all the sequences were from type material or submitted by *Trichoderma*  
218 taxonomists, the lower similarity of compared sequences was unlikely caused by the  
219 error taxonomic annotation. For ITS from *T. effusum*, there are a string of undetected  
220 nucleotides among the sequence (Fig 4a). That may be caused by the sequencing er-  
221 rors. For ITS from *T. pseudostramineum*, there are much INDEL mutation between  
222 the two sequences used for species identification (Fig 4b). The reality of the mutation  
223 needs to be confirmed from the corresponding strains.

224

### 225 **Misidentified *Trichoderma* species through nucleotide markers**

226 Compared with the unidentified *Trichoderma* species, the misidentified *Tricho-*  
227 *derma* species have to be made for further analysis in detail. There were 20 *Tricho-*  
228 *derma* species misidentified through one or more tested marker sequences as shown in  
229 Table 3. After analyzing the sequence similarity and genome locus of the marker se-  
230 quences used for testing and database construction, the reason of the misidentification  
231 was supposed to be the lacking of barcode gaps in overlap region. And meanwhile, the  
232 overlap region exhibits a higher sequence similarity interspecies than intraspecies. For  
233 instance, testing of TEF1 sequences sourced from *T. ceraceum*, *T. corneum*, *T. deli-*  
234 *quescens*, *T. lixii*, *T. longibrachiatum*, *T. pezizoides*, *T. pulvinatum*, *T. strictipile*, *T.*  
235 *sulphureum*, *T. tawa*, *T. tomentosum* and *T. virens*, RPB2 sequences from *T. cerinum*,  
236 *T. composticola*, *T. corneum*, *T. koningii*, *T. neosinense*, *T. paraviridescens*, *T. pulvi-*  
237 *natum*, *T. crystalligenum*, and *T. strictipile*, and ITS from *T. crystalligenum* and *T. ne-*  
238 *otropicale*. The tested TEF1 from *T. barbatum* and RPB2 from *T. lentiforme* did not  
239 contain barcode gaps for species identification even though they share same genome  
240 loci with the corresponding sequences in nucleotide database.

241 Considering the misidentified cases, it is suggested that with a specific retrieved  
242 candidate species, more characters should be employed to confirm the identification.  
243 A reliable species identification in PIST was based on the consistent identification of  
244 all nucleotide markers and phenotypic characters.

245

## 246 **Discussion**

247 The purpose of this study is to develop a polyphasic identification system for genus  
248 *Trichoderma* to keep in step with the burgeoning taxonomy system and facilitate  
249 *Trichoderma*-based research. Consequently, serious databases covering 252 *Tricho-*  
250 *derma* species were constructed, including 338 ITS sequences, 435 TEF1 sequences,  
251 415 RPB2 sequences and 28 phenotypic characters. In addition, this is the first report  
252 to adopt a polyphasic identification system for *Trichoderma* species identification.

253 Since being introduced by Persoon in 1794 (Druzhinina & Kubicek, 2005; Persoon,  
254 1794), *Trichoderma* taxonomy and species identification are difficult issues. The  
255 abundant homoplasy in phenetic characters is likely the reason (Druzhinina et al,  
256 2006). Therefore, the taxonomy and identification of *Trichoderma* have evolved from  
257 a single phenotypic character-based method to a molecular character-based method  
258 supplemented by phenotypic observation. Along the conversion, the major challenges  
259 have to be conquered, including unstable multiple phenotypic features and insufficient  
260 DNA barcode information. As the rapid changing in *Trichoderma* taxonomy, the spe-  
261 cies counts are continuously increasing and the current identification systems are not  
262 suitable for an accurate and efficient identification (Robbertse et al, 2017). Referring  
263 to the identification systems of speciose genera *Penicillium* and *Aspergillus*  
264 (<http://www.westerdijkinstituut.nl/Aspergillus/Biolomicsid.aspx>), the poly-  
265 phasic-based species identification is a promising method for *Trichoderma*.

266

### 267 **Comparison of different identification methods**

268 Phenotypic characters are traditionally employed to form the fungi taxonomic  
269 system and to identify fungi species in the manner of a phenotype-based species key.  
270 It is well documented that phenotypic characters is not efficient and effective as mo-  
271 lecular characters in species or genus identification (François et al, 2004; Raja et al,  
272 2017). For genus *Trichoderma*, the resolution of phenotypic characters in species  
273 identification is just limited within 27 species (Bissett, 1984; Bissett, 1991a; b; c;  
274 1992). However, this does not mean that the phenotypic method could be replaced by  
275 molecular method for species identification. The irreplaceability could be exemplified  
276 by the identification process of *T. cremeum* (Table 2) through PIST. Just by retrieving  
277 with a combination of TEF1 (98% Identity) and RPB2 (99% Identity) sequences, *T.*  
278 *cremeum* was not separated from *T. surrotundum*, but the good distinction of both  
279 species could be completed if a character of conidia shape (subglobose to ovoidal)  
280 was involved in the identification. This is why nowadays the integral of phenotypic  
281 and molecular characters was still needed to confirm a new *Trichoderma* species  
282 (Jaklitsch, 2011; Jaklitsch & Voglmayr, 2015b; Zhang et al, 2018b).

283 The DNA barcode is an effective tool for species identification initiated from the  
284 animal kingdom and then be introduced into fungi. To meet the requirement of a quick  
285 and accurate identification of *Trichoderma* species, ITS region-based barcode  
286 method was developed, named as *TrichOKey*, which is able to operate identification  
287 of 75 individual species (Druzhinina et al, 2005). However, the system is not powerful  
288 enough as more new *Trichoderma* species emerged. The ITS region was employed for  
289 fungal identification in almost all fungal databases (Geiser et al, 2004; Robert et al,  
290 2011; Yahr et al, 2016) and nominated as the official fungal barcode (Schoch et al,  
291 2012). However, as the number of species continuously increasing in genus *Tricho-*  
292 *derma*, 100 species in year 2006 and 256 species in 2015 (Bissett et al, 2015;  
293 Druzhinina et al, 2006), the ITS region could not bear a heavier load of species identi-  
294 fication due to its natural resolution. A concept of second barcode was proposed to  
295 deal with the speciose genera, including *Trichoderma* (Samson et al, 2014; Stielow et  
296 al, 2015). Although the *TrichoBLAST* program (Kopchinskiy et al, 2005) contains

297 multiloci markers for distinction of *Trichoderma* species, the retrieval processes of  
298 each marker are separated and lacking a cross-referring procedure among different  
299 marker databases, and the same problem also exists in Genbank (Robbertse et al,  
300 2017). A secondary metabolite profile-based chemotaxonomy method was also em-  
301 ployed in *Trichoderma* identification, but with a small scale of only 7 species (Kang  
302 et al, 2011). Thus currently or in a shortcoming days the characters cannot be applied  
303 in the taxonomy of *Trichoderma* species due to the overcomplexity of secondary me-  
304 tabolites among species.

305 Despite of the phylogenetic tree-based identification, superior in defining new  
306 species, but not convenient for identifying existed species, the polyphasic identifica-  
307 tion method has an advantage of comprehensive utilization of different characters (i.e.  
308 phenotype and molecular) particularly in combination with computer assistant system.  
309 A series of polyphasic identification systems have been developed for *Aspergillus*,  
310 *Penicillium*, *Fusarium* (<http://www.westerdijkinstituut.nl/Collections/>), *Ceratocystis*,  
311 *Colletotrichum* and *Phytophthora* (<http://www.q-bank.eu/fungi/>). All the polyphasic  
312 identification systems mentioned above are derived from BioloMICS software  
313 (Robert et al, 2011) and allow a simultaneous submission of several different charac-  
314 ters. And yet, no polyphasic identification system was designed for genus *Trichoder-*  
315 *ma*.

316 PIST is expected to be a polyphasic system for *Trichoderma* identification. The  
317 core part of PIST is a program coded in Perl language, making the cross referring of  
318 different kinds of databases practicable. Unlike other polyphasic identification meth-  
319 ods, the retrieval of characters in PIST is achieved in a step-by-step way. By this  
320 means, users are able to analysis the retrieval results after every submission action,  
321 and this is helpful especially deal with different nucleotide markers. During the test-  
322 ing process of PIST, different nucleotide markers and phenotypic characters showed  
323 complementary functions in species identification and turned out to identify 175  
324 *Trichoderma* species, indicating the advantage of the polyphasic method. There are  
325 only 13 species (*T. citrinum*, *T. corneum*, *T. crassum*, *T. crystalligenum*, *T. deli-*  
326 *quescens*, *T. effusum*, *T. lixii*, *T. neosinense*, *T. pezizoides*, *T. pseudostramineum*, *T.*  
327 *pulvinatum*, *T. strictipile*, *T. tawa*) cannot be identified due to lacking of enough se-  
328 quences information.

329

### 330 **Problems in the identification process using molecular characters**

331 Although the molecular character-based identification of fungi in species level is  
332 popular and predominant in taxonomy, there are problems needed to be resolved. One  
333 problem was the confounding of unverified and unqualified marker sequences depos-  
334 ited in open databases. This problem has attracted attention of taxonomist for a long  
335 time (D. et al, 2003; Druzhinina et al, 2005; Nilsson et al, 2006; Rytas, 2003). Fortu-  
336 nately, the problem has been successfully resolved since the numerous curated data-  
337 bases containing kinds of fungi nucleotide markers have been generated.

338 The current obstacle in species identification is mainly caused by the incon-  
339 sistency of the amplified fragments from nucleotide markers, and results in an uneven  
340 sequence alignment. Consequently, the overlap regions between query sequences and



341 subject sequences are likely to lose the barcode gaps or limited by retrieval parame-  
342 ters which in the end leading to a failure of species identification (Table 2), or even  
343 worse, an imperceptible misidentification (Table 3). To solve this problem, it was  
344 suggested that a unity of primer pairs used for amplifying nucleotide markers with the  
345 purpose of species identification. For genus *Trichoderma*, primer pairs of ITS4 and  
346 ITS5 for ITS marker, EF1728F and TEF1LLerev for TEF1 marker, fRPB2-5f and  
347 fRPB2-7cr for RPB2 marker are competent for species identification as they were  
348 able to generate amplicons with good resolution. (Jaklitsch, 2011; Jaklitsch &  
349 Voglmayr, 2015b; Martin & Rygiewicz, 2005b; Schoch et al, 2012).

350

## 351 **Prospective**

352 A useful identification system depends heavily on qualified character databases.  
353 Currently, in the public databases, although the error characters are being corrected, a  
354 continuous update of databases is essential. For PIST, a complete set of phenotypic  
355 characters covering all species and standardized nucleotide databases will further im-  
356 prove the efficiency and accuracy of species identification. To achieve this goal, the  
357 assistance from *Trichoderma* taxonomist is imperative.

358 As the ever-growing requirement of identification even below the species level,  
359 such as an aggregation of *Trichoderma* strains with superior chitinase formation  
360 (Nagy et al, 2007), more nucleotide markers or characters from new dimensions will  
361 be developed and employed for identification. The polyphasic method will show a  
362 significant advantage and broad applications.

363

## 364 **Materials and methods**

### 365 **Nucleotide marker databases**

366 There are 213 ITS, 252 TEF1, and 243 RPB2 marker sequences representing 252  
367 *Trichoderma* species included in the initial nucleotide marker databases (Appendix  
368 Table 1). All the marker sequences were picked out from the Genbank database  
369 mainly referring to a recently published article where a list of accepted *Trichoderma*  
370 names, reference strains and marker sequence accession numbers were proposed by  
371 *Trichoderma* taxonomists (Bissett et al, 2015). Actually, some marker sequences  
372 (Appendix Table 2&3) published in the reference article are obviously ambiguous for  
373 taxonomy use (Bissett et al, 2015). In these cases, marker sequences submitted from  
374 culture collections by *Trichoderma* taxonomists (i.e. John Bissett, Walter Gams, Wal-  
375 ter Jaklitsch, Gary J. Samuels, Christian Kubicek, WY Zhuang) or certificated from  
376 type materials by NCBI were chosen as replacements.

377

### 378 **Phenotype database**

379 The phenotypic characters used for database construction are partially adopted  
380 from the interactive key created by Samuels and colleagues. This database contains 28  
381 characters from 46 *Trichoderma* species, and stored in a text file. All the *Trichoderma*

382 names were in accordance with the currently accepted names (Bissett et al, 2015).

383

### 384 **Identification program**

385 The PIST system is running in an Ubuntu Linux 16.04 server maintained by Cen-  
386 ter for Culture Collection of *Trichoderma* in Shanghai Jiao Tong University, and  
387 available through a web interface (<http://mmit.china-cctc.org/>). The operating envi-  
388 ronment is supported by Apache2, PHP5.3.3, BLAST program (Altschul et al, 1990),  
389 Perl and Bioperl. The interactive function between users and the web interface is  
390 achieved using PHP language. Nucleotide marker databases were formatted by  
391 BLAST program (Altschul et al, 1990) and stored separately according to the markers.  
392 The core cross-referring program was written in Perl language with Bioperl package,  
393 and perform the following functions:

394 (1) Retrieving corresponding databases (in the manner of calling BLAST pro-  
395 gram for nucleotide marker databases, and field matching for phenotypic database)  
396 according to the submission of users and return species names as a result.

397 (2) Adjusting all databases in limited scopes in accordance with the latest retriev-  
398 al results.

399 (3) Preparing the limited databases for the next retrieve unless initialization.

400 (4) Adjusting the parameters (i.e. identity, coverage) when retrieving nucleotide  
401 marker databases by BLAST program (Altschul et al, 1990).

402 (5) Initializing for a new retrieval.

403

### 404 **Verification of PIST**

405 Totally 125 ITS, 183 TEF1, 172 RPB2 marker sequences from 188 *Trichoderma*  
406 species were used for determining the performance of PIST (Appendix Table 4) in  
407 consideration of the limitation of corresponding marker sequences available. The  
408 principles for selecting marker sequences and *Trichoderma* strains are the same with  
409 those for selecting marker sequences in nucleotide marker databases. In addition, for  
410 one *Trichoderma* species, the three markers should be of the same strain in order to  
411 determine the accuracy of PIST. The loci of the marker sequences were determined by  
412 *Tricho*MARK (Kopchinskiy et al, 2005). All kinds of possible combinations of the  
413 three nucleotide markers were used for *Trichoderma* spp. identification. After the ver-  
414 ification process, all the tested sequences were integrated into the corresponding nu-  
415 cleotide marker databases.

416

### 417 **Acknowledgement**

418 This work was supported by The National Key Research and Development Pro-  
419 gram of China (2017YFD0201108, 2017YFD0200403); Sino-US innovation program  
420 in key technology of crop disease and pest biological control; “948”key project of the  
421 Ministry of Agriculture of China (2016-X48); China Agricultural Research System  
422 (CARS-02); Intergovernmental Key International Scientific and Technological Inno-  
423 vation Cooperation (2017YFE0104900). Dr. He Meng and Weixing Ye are thanked

424 for the support of software development.

425

## 426 **Competing interests**

427 No conflict of interest exists in the submission of this manuscript, and the manu-  
428 script is approved by all authors for publication. I would like to declare on behalf of  
429 my co-authors that the work described was original research that has not been pub-  
430 lished previously, and not under consideration for publication elsewhere, in whole or  
431 in part. All the authors listed have approved the manuscript that is enclosed.

432

## 433 **References**

- 434 Altschul, S. F., Gish, W., Miller, W., Myers, E. W. & Lipman, D. J. (1990) Basic local alignment search tool.  
435 *Journal of Molecular Biology*, 215(3), 403-410.
- 436 AlZahal, O., Waite, A., Walker, N. D., Byrd, T. & Bechtol, D. (2017) 550 The application of Trichoderma  
437 fermentation extract to growing and finishing rations improved beef cattle performance. *Journal of*  
438 *Animal Science*, 95(suppl\_4), 269-269.
- 439 Bissett, J. (1984) A revision of the genus Trichoderma. I. Section Longibrachiatum sect. nov. *Canadian*  
440 *Journal of Botany*, 62(5), 924-931.
- 441 Bissett, J. (1991a) A revision of the genus Trichoderma. II. Infrageneric classification. *Canadian Journal*  
442 *of Botany*, 69(11), 2357-2372.
- 443 Bissett, J. (1991b) A revision of the genus Trichoderma. III. Section Pachybasium. *Canadian Journal of*  
444 *Botany*, 69(11), 2373-2417.
- 445 Bissett, J. (1991c) A revision of the genus Trichoderma. IV. Additional notes on section  
446 Longibrachiatum. *Canadian Journal of Botany*, 69(11), 2418-2420.
- 447 Bissett, J. (1992) Trichoderma atroviride. *Canadian Journal of Botany*, 70(3), 639-641.
- 448 Bissett, J., Gams, W., Jaklitsch, W. & Samuels, G. J. (2015) Accepted Trichoderma names in the year  
449 2015. *IMA Fungus*, 6(2), 263-295.
- 450 C., S., Krishna, A. L., Madhavan, N. K., P., B., George, S. & Ashok, P. (2004) Extracellular chitinase  
451 production by Trichoderma harzianum in submerged fermentation. *Journal of Basic Microbiology*,  
452 44(1), 49-58.
- 453 Chaverri, P., Branco-Rocha, F., Jaklitsch, W., Gazis, R., Degenkolb, T. & Samuels, G. J. (2015) Systematics  
454 of the Trichoderma harzianum species complex and the re-identification of commercial biocontrol  
455 strains. *Mycologia*, 107(3), 558-590.
- 456 Chen, K. & Zhuang, W. Y. (2017) Discovery from a large-scaled survey of Trichoderma in soil of China.  
457 *Scientific Reports*, 7, 37.
- 458 Contreras-Cornejo, H. A., Macías-Rodríguez, L., Cortés-Penagos, C. & López-Bucio, J. (2009)  
459 *Trichoderma virens*, a Plant Beneficial Fungus, Enhances Biomass Production and  
460 Promotes Lateral Root Growth through an Auxin-Dependent Mechanism in Arabidopsis. *Plant*  
461 *Physiology*, 149(3), 1579-1592.
- 462 D., B. P., J., R. P., M., S. B. & Gita, P. (2003) On the unreliability of published DNA sequences. *New*  
463 *Phytologist*, 160(1), 43-48.
- 464 de Azevedo, A. M. C., De Marco, J. L. & Felix, C. R. (2000) Characterization of an amylase produced by a

465 Trichoderma harzianum isolate with antagonistic activity against Crinipellis pernicioso, the causal  
466 agent of witches' broom of cocoa. *FEMS Microbiology Letters*, 188(2), 171-175.

467 Druzhinina, I. & Kubicek, C. P. (2005) Species concepts and biodiversity in Trichoderma and Hypocrea:  
468 from aggregate species to species clusters? *Journal of Zhejiang University. Science. B*, 6(2), 100-112.

469 Druzhinina, I. S. & Kopchinskiy, A. G. (2006) *TrichOKey v. 2 - A DNA oligonucleotide BarCode program*  
470 *for the identification of multiple sequences of hypocrea and trichoderma*. Translated from English by.  
471 40128 Bologna: Medimond S R L.

472 Druzhinina, I. S., Kopchinskiy, A. G., Komoń, M., Bissett, J., Szakacs, G. & Kubicek, C. P. (2005) An  
473 oligonucleotide barcode for species identification in Trichoderma and Hypocrea. *Fungal Genetics and*  
474 *Biology*, 42(10), 813-828.

475 Druzhinina, I. S., Kopchinskiy, A. G. & Kubicek, C. P. (2006) The first 100 Trichoderma species  
476 characterized by molecular data. *Mycoscience*, 47(2), 55-64.

477 François, L., Frank, K., J., C. C., David, M., Gail, C., Bryn, D., Mahajabeen, P., David, H., Y., J. T., Elisabeth,  
478 B., Martin, G., Valérie, R., Valérie, H., Conrad, S., Elizabeth, A. A., Jolanta, M., Joseph, S., Desiree, J.,  
479 Sarah, H., Michael, C., Robert, S., Gi-Ho, S., Robert, L., Thorsten, L., Kerry, O. D., Manfred, B., Paul, D.,  
480 Damien, E., Cécile, G., Karen, H., C., H. R., Kentaro, H., Young-Woon, L., Brandon, M., Hiromi, N., Don,  
481 P., Jack, R., Amy, R., Imke, S., Harrie, S., Jeffrey, S., Junta, S., Rebecca, Y. & Rytas, V. (2004) Assembling  
482 the fungal tree of life: progress, classification, and evolution of subcellular traits. *American Journal of*  
483 *Botany*, 91(10), 1446-1480.

484 Geiser, D. M., del Mar Jiménez-Gasco, M., Kang, S., Makalowska, I., Veeraraghavan, N., Ward, T. J.,  
485 Zhang, N., Kulda, G. A. & O'donnell, K. (2004) FUSARIUM-ID v. 1.0: A DNA Sequence Database for  
486 Identifying Fusarium. *European Journal of Plant Pathology*, 110(5), 473-479.

487 Harman, G. E., Howell, C. R., Viterbo, A., Chet, I. & Lorito, M. (2004) Trichoderma species —  
488 opportunistic, avirulent plant symbionts. *Nature Reviews Microbiology*, 2, 43.

489 Hebert, P. D. N., Cywinska, A., Ball, S. L. & deWaard, J. R. (2003a) Biological identifications through  
490 DNA barcodes. *Proceedings of the Royal Society of London. Series B: Biological Sciences*, 270(1512),  
491 313-321.

492 Hebert, P. D. N., Ratnasingham, S. & de Waard, J. R. (2003b) Barcoding animal life: cytochrome  
493 *c* oxidase subunit 1 divergences among closely related species. *Proceedings of the Royal*  
494 *Society of London. Series B: Biological Sciences*, 270(Suppl 1), S96-S99.

495 Jaklitsch, W. (2011) European species of Hypocrea part II: species with hyaline ascospores. *Fungal*  
496 *Diversity*, 48(1), 1-250.

497 Jaklitsch, W. M. & Voglmayr, H. (2015a) Biodiversity of Trichoderma (Hypocreaceae) in Southern  
498 Europe and Macaronesia. *Studies in Mycology*(80), 1-87.

499 Jaklitsch, W. M. & Voglmayr, H. (2015b) Biodiversity of Trichoderma (Hypocreaceae) in Southern  
500 Europe and Macaronesia. *Studies in Mycology*, 80, 1-87.

501 Kang, D., Kim, J., Choi, J. N., Liu, K.-H. & Lee, C. H. (2011) Chemotaxonomy of Trichoderma spp. using  
502 mass spectrometry-based metabolite profiling. *Journal of microbiology and biotechnology*, 21(1),  
503 5-13.

504 Kopchinskiy, A., Komoń, M., Kubicek, C. P. & Druzhinina, I. S. (2005) Tricho Blast: A Multilocus Database  
505 for Trichoderma and Hypocrea Identifications. *Mycological Research*, 109(6), 658-660.

506 Liu, Y. J., Whelen, S. & Hall, B. D. (1999) Phylogenetic relationships among ascomycetes: evidence from  
507 an RNA polymerase II subunit. *Molecular Biology and Evolution*, 16(12), 1799-1808.

508 Martin, K. & Rygiewicz, P. (2005a) Fungal-specific PCR primers developed for analysis of the ITS region

509 of environmental DNA extracts. *BMC Microbiology*, 5(1), 28.

510 Martin, K. J. & Rygiewicz, P. T. (2005b) Fungal-specific PCR primers developed for analysis of the ITS  
511 region of environmental DNA extracts. *BMC Microbiology*, 5(1), 28.

512 Matarese, F., Sarrocco, S., Gruber, S., Seidl-Seiboth, V. & Vannacci, G. (2012) Biocontrol of Fusarium  
513 head blight: interactions between Trichoderma and mycotoxigenic Fusarium. *Microbiology*, 158(1),  
514 98-106.

515 Mohamed-Benkada, M., Montagu, M., Biard, J. F., Mondeguer, F., Verite, P., Dalgarrondo, M., Bissett,  
516 J. & Pouchus, Y. F. (2006) New short peptaibols from a marine Trichoderma strain. *Rapid*  
517 *Communications in Mass Spectrometry*, 20(8), 1176-1180.

518 Nagy, V., Seidl, V., Szakacs, G., Komoń-Zelazowska, M., Kubicek, C. P. & Druzhinina, I. S. (2007)  
519 Application of DNA Bar Codes for Screening of Industrially Important Fungi: the Haplotype of  
520 Trichoderma harzianum Sensu Stricto Indicates Superior Chitinase Formation. *Applied and*  
521 *Environmental Microbiology*, 73(21), 7048-7058.

522 Nilsson, R. H., Kristiansson, E., Ryberg, M., Hallenberg, N. & Larsson, K.-H. (2008) Intraspecific ITS  
523 Variability in the Kingdom Fungi as Expressed in the International Sequence Databases and Its  
524 Implications for Molecular Species Identification. *Evolutionary Bioinformatics*, 4, EBO.S653.

525 Nilsson, R. H., Ryberg, M., Kristiansson, E., Abarenkov, K., Larsson, K.-H. & Kõljalg, U. (2006) Taxonomic  
526 Reliability of DNA Sequences in Public Sequence Databases: A Fungal Perspective. *PLOS ONE*, 1(1),  
527 e59.

528 O'Brien, H. E., Parrent, J. L., Jackson, J. A., Moncalvo, J.-M. & Vilgalys, R. (2005) Fungal Community  
529 Analysis by Large-Scale Sequencing of Environmental Samples. *Applied and Environmental*  
530 *Microbiology*, 71(9), 5544-5550.

531 Persoon, C. H. (1794) Disposita methodical fungorum. *Romers Neues Mag Bot*, 1, 81-128.

532 Raja, H. A., Miller, A. N., Pearce, C. J. & Oberlies, N. H. (2017) Fungal Identification Using Molecular  
533 Tools: A Primer for the Natural Products Research Community. *Journal of Natural Products*, 80(3),  
534 756-770.

535 Robbertse, B., Strope, P. K., Chaverri, P., Gazis, R., Ciufu, S., Domrachev, M. & Schoch, C. L. (2017)  
536 Improving taxonomic accuracy for fungi in public sequence databases: applying 'one name one species'  
537 in well-defined genera with Trichoderma/Hypocrea as a test case. *Database*, 2017, bax072-bax072.

538 Robert, V., Szoke, S., Jabas, B., Vu, D., Chouchen, O., Blom, E. & Cardinali, G. (2011) BioloMICS software:  
539 Biological data management, identification, classification and statistics. *Open Applied Informatics*  
540 *Journal*, 5, 87-98.

541 Rytas, V. (2003) Taxonomic misidentification in public DNA databases. *New Phytologist*, 160(1), 4-5.

542 Samson, R. A., Visagie, C. M., Houbraken, J., Hong, S. B., Hubka, V., Klaassen, C. H. W., Perrone, G.,  
543 Seifert, K. A., Susca, A., Tanney, J. B., Varga, J., Kocsubé, S., Szigeti, G., Yaguchi, T. & Frisvad, J. C. (2014)  
544 Phylogeny, identification and nomenclature of the genus Aspergillus. *Studies in Mycology*, 78,  
545 141-173.

546 Schoch, C. L., Seifert, K. A., Huhndorf, S., Robert, V., Spouge, J. L., Levesque, C. A. & Chen, W. (2012)  
547 Nuclear ribosomal internal transcribed spacer (ITS) region as a universal DNA barcode marker for  
548 *Fungi*. *Proceedings of the National Academy of Sciences*, 109(16), 6241-6246.

549 Stielow, J. B., Lévesque, C. A., Seifert, K. A., Meyer, W., Iriny, L., Smits, D., Renfurm, R., Verkley, G. J. M.,  
550 Groenewald, M., Chaduli, D., Lomascolo, A., Welti, S., Lesage-Meessen, L., Favel, A., Al-Hatmi, A. M. S.,  
551 Damm, U., Yilmaz, N., Houbraken, J., Lombard, L., Quaedvlieg, W., Binder, M., Vaas, L. A. I., Vu, D.,  
552 Yurkov, A., Begerow, D., Roehl, O., Guerreiro, M., Fonseca, A., Samerpitak, K., van Diepeningen, A. D.,



553 Dolatabadi, S., Moreno, L. F., Casaregola, S., Mallet, S., Jacques, N., Roscini, L., Egidi, E., Bizet, C.,  
554 Garcia-Hermoso, D., Martín, M. P., Deng, S., Groenewald, J. Z., Boekhout, T., de Beer, Z. W., Barnes, I.,  
555 Duong, T. A., Wingfield, M. J., de Hoog, G. S., Crous, P. W., Lewis, C. T., Hambleton, S., Moussa, T. A. A.,  
556 Al-Zahrani, H. S., Almaghrabi, O. A., Louis-Seize, G., Assabgui, R., McCormick, W., Omer, G., Dukik, K.,  
557 Cardinali, G., Eberhardt, U., de Vries, M. & Robert, V. (2015) One fungus, which genes? Development  
558 and assessment of universal primers for potential secondary fungal DNA barcodes. *Persoonia* :  
559 *Molecular Phylogeny and Evolution of Fungi*, 35, 242-263.

560 Thangadurai, D., Sangeetha, J. & David, M. (2016) *MOLECULAR TOOLS FOR IDENTIFICATION OF FUNGI*.  
561 Translated from English by, 1. Boca Raton: Crc Press-Taylor & Francis Group.

562 Toyama, H., Yamagishi, N. & Toyama, N. (2002) Construction of cellulase hyper-producers of  
563 *Trichoderma reesei* Rut C-30 for utilization of waste paper using colchicine and benomyl. *Journal of*  
564 *Molecular Catalysis B: Enzymatic*, 17(3), 175-178.

565 Tripathi, P., Singh, P. C., Mishra, A., Chauhan, P. S., Dwivedi, S., Bais, R. T. & Tripathi, R. D. (2013)  
566 *Trichoderma*: a potential bioremediator for environmental clean up. *Clean Technologies and*  
567 *Environmental Policy*, 15(4), 541-550.

568 Urmas, K., Karl - Henrik, L., Kessy, A., Henrik, N. R., J., A. I., Ursula, E., Susanne, E., Klaus, H., Rasmus,  
569 K., Ellen, L., Taina, P., Robin, S., S., T. A. F., Leho, T. & Trude, V. (2005) UNITE: a database providing  
570 web - based methods for the molecular identification of ectomycorrhizal fungi. *New Phytologist*,  
571 166(3), 1063-1068.

572 Yahr, R., Schoch, C. L. & Dentinger, B. T. M. (2016) Scaling up discovery of hidden diversity in fungi:  
573 impacts of barcoding approaches. *Philosophical Transactions of the Royal Society B: Biological Sciences*,  
574 371(1702).

575 Zhang, J., Wu, C., Wang, W., Wang, W. & Wei, D. (2018a) A versatile *Trichoderma reesei* expression  
576 system for the production of heterologous proteins. *Biotechnology Letters*, 40(6), 965-972.

577 Zhang, X., Li, X., Yang, H. & Cui, Z. (2018b) Biochemical mechanism of phytoremediation process of  
578 lead and cadmium pollution with *Mucor circinelloides* and *Trichoderma asperellum*. *Ecotoxicology and*  
579 *Environmental Safety*, 157, 21-28.

580

581

582

583

584

585

586

587

588

589

590

591

592

593

594

595

596

**Fig 1** The number of publications related to *Trichoderma* in Wed of Science from 1997 to 2017

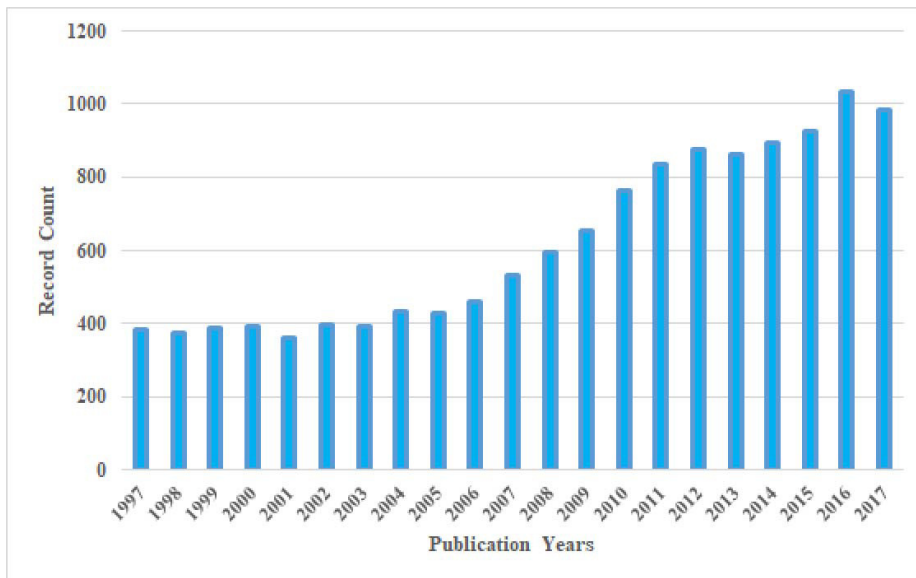

**Fig 2** The research fields related to *Trichoderma* in Wed of Science from 1997 to 2017

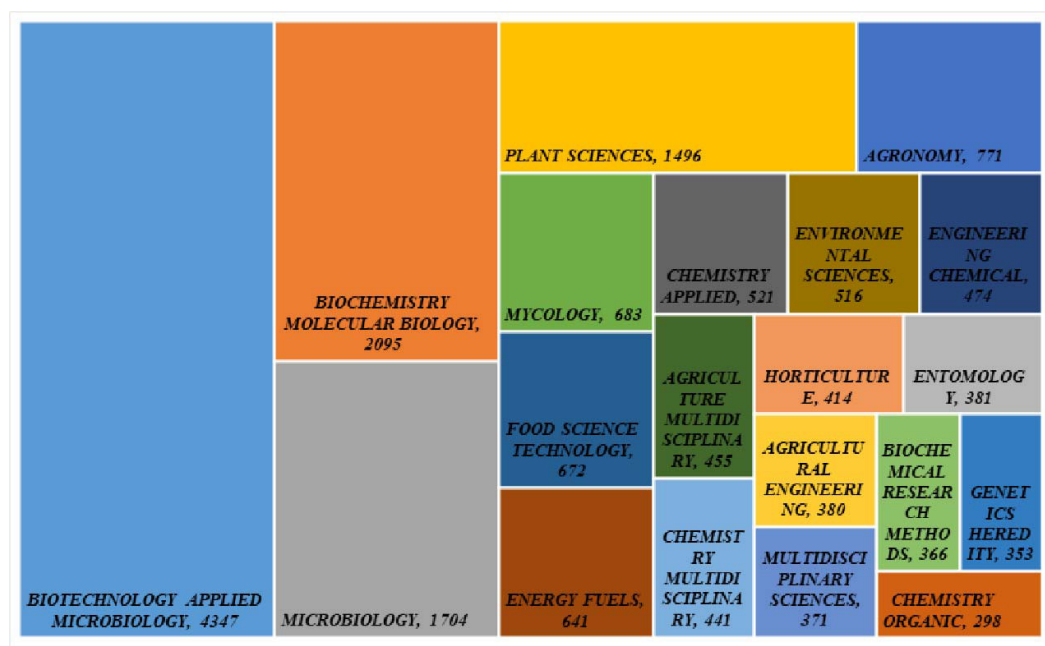

**Fig 3** Outline of the web interface of PIST

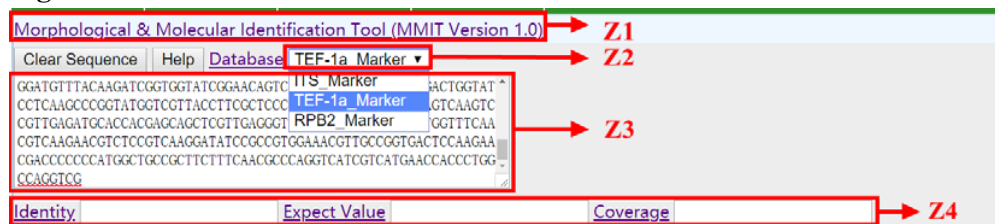

a

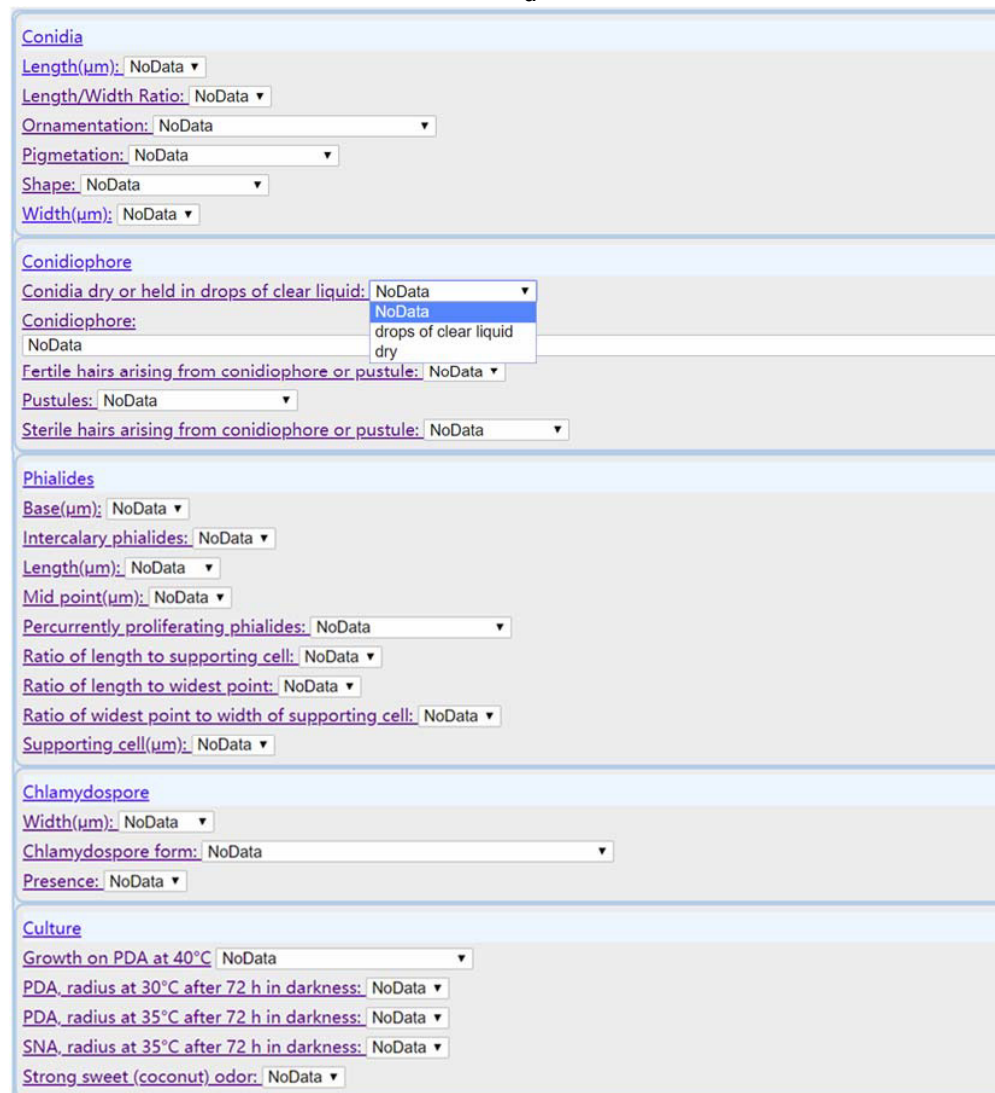

b

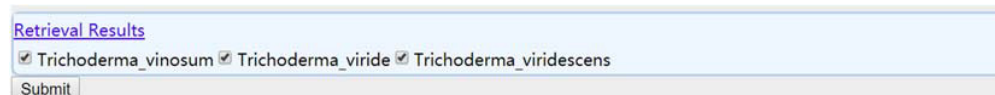

c

a, b, c exhibit Block 1, Block 2 and Block 3 of the interface separately. Z1, Z2 and Z3 in red color represent three operation zones in Block1, and the corresponding area was indicated in red boxes.



**Fig 4** Tested marker sequences showed low sequence similarity intraspecies

```
>AF149858.1 Trichoderma_effusum
GTGAACGTTACCAATCTGTTGCTCGGCGGGATCTCTGCCCGGGCGCGTCGCAGCCCCG
GATCCCATGGCGCCCGCGGAGGACCAACCAAACCTCTTTTTTCTCCTCGCGGCCCTC
GTCGCGGCTCTGTTTTACTTTTGTCTGAGCCTTTCTCGGCGACCCTAGCGGGCGTCTCG
AAAAATGAATCAAACCTTTCANNNNNNNNNNNNNNNNNNATGCTCTTGGTTCTGGCATCGA
TGAAGAACGCAGCGAAATGCGATAAGTAATGTGAATTGCAGAATTCAGTGAATCATCGAA
TCTTTGAACGCACATTGCGCCCGCCAGTATTCTGGCGGGCATGCCTGTCCGAGCGTCATT
TCAACCCTCGAACCCCTCCGGGGGGTTCGGCGTTGGGGATCGGCCCTCACGGGGCCGCC
CCGAAATCCAGTGGCGGTCTCGCCGCGAGCCTCTCCTGCGCAGTAGTTGCACACTCGCAC
CGGGAGCGCGGCGGCCACAGCCGTAATAACACCCCAAACCTCTGAAATGTTGACCTCGGA
TCAGGTAGGA
```

**a**

Range 1: 1 to 504 [Graphics](#)

| Score         | Expect                                                       | Identities   | Gaps       |
|---------------|--------------------------------------------------------------|--------------|------------|
| 664 bits(736) | 0.0                                                          | 474/548(86%) | 51/548(9%) |
| Query 79      | GTGAACGTTACCAATCGTTGCTCGGCGGGT-ATTT-CTGCCCGGGCGCGTCGC        | 133          |            |
| Sbjct 1       | GTGAACGTTACCAATCTGTTGCTCGGCGGGTCAATTTTTCTCGCCCGGGCGCGTCGC    | 60           |            |
| Query 134     | AGCCCCGACCAAGGCGCCCGGAGGACCAACTTACAAACTCtttttttttCTTTTA      | 193          |            |
| Sbjct 61      | AGCCCCGACCAAGGCGCCCGGAGGACCAACTCGCAAACCTTTTTTGTTA-TATC       | 118          |            |
| Query 194     | CGGGGAGGCGTCTTCGCGGACTCTCTTTGTGAAATATTTTACAGCTTCTGAGCTTCTC   | 253          |            |
| Sbjct 119     | C-CTTCGCGGATTTTCTGT-CA-CTTCTGAGCTTCTC                        | 153          |            |
| Query 254     | GGCGCTCTAGCGGGCTTTCGAAAAATGAATCAAACCTTTC AACACGGATCTCTTGGT   | 313          |            |
| Sbjct 154     | GGCGCCCTAGCGGGCTTTCRAAA-ATGAATCAAACCTTTC AACACGGATCTCTTGGT   | 212          |            |
| Query 314     | TCTGGCATCGATGAAGAACGCAGCGAAATGCGATAAGTAATGTGAATTGCAGAATTCAGT | 373          |            |
| Sbjct 213     | TCTGGCATCRATGAAGAACGCAGCGAAATGCGATAAGTAATGTGAATTGCAGAATTCAGT | 272          |            |
| Query 374     | GAATCATCGAATCTTTGAACGCACATTGCGCCCGCCAGTATTCTGGCGGGCATGCCTGTC | 433          |            |
| Sbjct 273     | GAATCATCGAATCTTTGAACGCACATTGCGCCCGCCAGTATTCTGGCGGGCATGCCTGTC | 332          |            |
| Query 434     | CGAGCGTCATTTCAACCCCTCGAGCCCTCC-GGGGGTTCGGCGTTGGGGATCGGCCTTC  | 491          |            |
| Sbjct 333     | CGAGCGTCATTTCAACCCCTCGAGCCCTCCCGGGGGTTCGGCGTTGGGGATCGGCCTTAC | 392          |            |
| Query 492     | CCGCCCTCGCGGGGTTTCGCCGCCCCGAAATGCAGTGGCGGTCTCGCCGAGCCTCTC    | 551          |            |
| Sbjct 393     | AC-TGCCGTCCCCGAAATACAGTGGCGGTCTCGCCGAGCCTCTC                 | 436          |            |
| Query 552     | CTGCGCAGTAGTTTGCACACTCGCAACGGGAGCGCGCGTCCACGGCCGTAATAAC      | 611          |            |
| Sbjct 437     | CTGCGCAGTAGTTTGCACACTCGCAACGGGAGCGCGCGTCCACGGCCGTAATAAC      | 496          |            |
| Query 612     | CCAAACTC 619                                                 |              |            |
| Sbjct 497     | CCAAACTC 504                                                 |              |            |

**b**

**a** exhibits the tested ITS sequence containing undetected nucleotides from *T. effusum*  
**b** exhibits the sequence alignment of ITS sequences from two *T. pseudostramineum* strains. Query sequence is the tested ITS from *T. pseudostramineum* TUF6 60104 with an accession number of ND134435. Sbjct sequence is ITS deposited in nucleotide marker databases from *T. pseudostramineum* GJS 90-74 with an accession number of DQ835420.

**Table 1** Accurately identified *Trichoderma* species through nucleotide markers with default retrieval parameters

| Species                                   | ITS | TEF1 | RPB2 | ITS+TEF1 | ITS+RPB2 | TEF1+RPB2 | ITS+TEF1+RPB2 |
|-------------------------------------------|-----|------|------|----------|----------|-----------|---------------|
| <i>T. aeroaquaticum</i>                   | 12  | 1    | 1    | 1        | 1        | 1         | 1             |
| <i>T. aethiopicum</i>                     | ND  | 1    | ND   | ND       | ND       | ND        | ND            |
| <i>T. afarasin</i>                        | 27  | 1    | 2    | 1        | 2        | 1         | 1             |
| <i>T. aggressivum</i> f. <i>europaeum</i> | 21  | 2    | 8    | 1        | 5        | 2         | 1             |
| <i>T. albolutescens</i>                   | ND  | 1    | 1    | ND       | ND       | 1         | ND            |
| <i>T. alni</i>                            | 20  | 1    | 9    | 1        | 3        | 1         | 1             |
| <i>T. alutaceum</i>                       | 1   | 1    | 1    | 1        | 1        | 1         | 1             |
| <i>T. amazonicum</i>                      | 26  | 1    | 6    | 1        | 5        | 1         | 1             |
| <i>T. applanatum</i>                      | 1   | 4    | 1    | 1        | 1        | 1         | 1             |
| <i>T. arundinaceum</i>                    | 7   | 1    | 1    | 1        | 1        | 1         | 1             |
| <i>T. asperelloides</i>                   | 53  | 1    | 3    | 1        | 3        | 1         | 1             |
| <i>T. asperellum</i>                      | 51  | 1    | 3    | 1        | 3        | 1         | 1             |
| <i>T. atrogelatinosum</i>                 | ND  | 1    | 1    | ND       | ND       | 1         | ND            |
| <i>T. atroviride</i>                      | 47  | 3    | 2    | 2        | 1        | 1         | 1             |
| <i>T. auranteffusum</i>                   | 1   | 1    | 1    | 1        | 1        | 1         | 1             |
| <i>T. aureoviride</i>                     | 1   | 1    | 1    | 1        | 1        | 1         | 1             |
| <i>T. bavaricum</i>                       | 1   | 1    | 1    | 1        | 1        | 1         | 1             |
| <i>T. bissettii</i>                       | 15  | 2    | ND   | 1        | ND       | ND        | ND            |
| <i>T. brevicompactum</i>                  | 7   | 1    | 2    | 1        | 2        | 1         | 1             |
| <i>T. britaniae</i>                       | 1   | 1    | 1    | 1        | 1        | 1         | 1             |
| <i>T. brunneoviride</i>                   | 1   | 1    | 1    | 1        | 1        | 1         | 1             |
| <i>T. caerulescens</i>                    | 3   | 3    | 1    | 1        | 1        | 1         | 1             |
| <i>T. capillare</i>                       | ND  | 1    | 1    | ND       | ND       | 1         | ND            |
| <i>T. ceramicum</i>                       | ND  | 1    | 3    | ND       | ND       | 1         | ND            |
| <i>T. christiani</i>                      | ND  | 1    | 8    | ND       | ND       | 1         | ND            |
| <i>T. chromospermum</i>                   | ND  | 1    | 1    | ND       | ND       | 1         | ND            |
| <i>T. cinnamomeum</i>                     | ND  | 3    | 1    | ND       | ND       | 1         | ND            |
| <i>T. citrinoviride</i>                   | 15  | ND   | 1    | ND       | 1        | ND        | ND            |
| <i>T. danicum</i>                         | ND  | 1    | 1    | ND       | ND       | 1         | ND            |
| <i>T. eiji</i>                            | 14  | 4    | 2    | 3        | 2        | 1         | 1             |
| <i>T. epimyces</i>                        | 10  | 1    | 1    | 1        | 1        | 1         | 1             |
| <i>T. erinaceus</i>                       | 48  | 1    | 1    | 1        | 1        | 1         | 1             |
| <i>T. evansii</i>                         | 18  | 1    | 1    | 1        | 1        | 1         | 1             |
| <i>T. foliicola</i>                       | 8   | 1    | 1    | 1        | 1        | 1         | 1             |
| <i>T. fomiticola</i>                      | 5   | 1    | 1    | 1        | 1        | 1         | 1             |
| <i>T. gamsii</i>                          | 52  | 1    | 3    | 1        | 3        | 1         | 1             |
| <i>T. gelatinosum</i>                     | ND  | 1    | 1    | ND       | ND       | 1         | ND            |
| <i>T. gliocladium</i>                     | ND  | 2    | 1    | ND       | ND       | 1         | ND            |
| <i>T. guizhouense</i>                     | 1   | 2    | 4    | 1        | 1        | 1         | 1             |
| <i>T. harzianum</i>                       | 23  | 2    | 1    | 2        | 1        | 1         | 1             |

|                             |    |    |    |    |    |    |    |
|-----------------------------|----|----|----|----|----|----|----|
| <i>T. helicolithii</i>      | ND | 4  | 1  | ND | ND | 1  | ND |
| <i>T. intricatum</i>        | 48 | 1  | ND | 1  | ND | ND | ND |
| <i>T. italicum</i>          | ND | 1  | 9  | ND | ND | 1  | ND |
| <i>T. lanuginosum</i>       | 10 | 1  | 6  | 1  | 6  | 1  | 1  |
| <i>T. leguminosarum</i>     | ND | 1  | 1  | ND | ND | 1  | ND |
| <i>T. leucopus</i>          | 1  | 1  | 1  | 1  | 1  | 1  | 1  |
| <i>T. lieckfeldtae</i>      | 35 | 1  | 1  | 1  | 1  | 1  | 1  |
| <i>T. longipile</i>         | 10 | 3  | 2  | 1  | 2  | 1  | 1  |
| <i>T. margaretense</i>      | ND | 1  | 1  | ND | ND | 1  | ND |
| <i>T. medusae</i>           | 10 | 1  | 6  | 1  | 6  | 1  | 1  |
| <i>T. microcitrinum</i>     | 2  | 1  | 1  | 1  | 1  | 1  | 1  |
| <i>T. moravicum</i>         | 4  | ND | 1  | ND | 1  | ND | ND |
| <i>T. neocrassum</i>        | ND | 11 | 3  | ND | ND | 1  | ND |
| <i>T. neorufoides</i>       | 13 | 1  | 2  | 1  | 2  | 1  | 1  |
| <i>T. neorufum</i>          | 11 | 1  | 2  | 1  | 2  | 1  | 1  |
| <i>T. nothescens</i>        |    |    |    |    |    |    |    |
| <i>T. novae-zelandiae</i>   | ND | 1  | 2  | ND | ND | 1  | ND |
| <i>T. nybergianum</i>       | 1  | 1  | 1  | 1  | 1  | 1  | 1  |
| <i>T. ovalisporum</i>       | 51 | 1  | 12 | 1  | 10 | 1  | 1  |
| <i>T. pachypallidum</i>     | 1  | ND | 1  | ND | 1  | ND | ND |
| <i>T. paratroviride</i>     | ND | 1  | 5  | ND | ND | 1  | ND |
| <i>T. parepimyces</i>       | 1  | 1  | 8  | 1  | 1  | 1  | 1  |
| <i>T. parmastoi</i>         | ND | 1  | 1  | ND | ND | 1  | ND |
| <i>T. paucisporum</i>       | 50 | 1  | 2  | 1  | 2  | 1  | 1  |
| <i>T. piluliferum</i>       | 8  | 1  | 1  | 1  | 1  | 1  | 1  |
| <i>T. pinnatum</i>          | ND | 1  | 4  | ND | ND | 1  | ND |
| <i>T. placentula</i>        | 8  | ND | 1  | ND | 1  | ND | ND |
| <i>T. pleuroti</i>          | 24 | 1  | ND | 1  | ND | ND | ND |
| <i>T. pleurotica</i>        | 25 | 1  | ND | 1  | ND | ND | ND |
| <i>T. pseudogelatinosum</i> | 1  | 1  | 1  | 1  | 1  | 1  | 1  |
| <i>T. pseudolacteum</i>     | 1  | 1  | 1  | 1  | 1  | 1  | 1  |
| <i>T. pyramidale</i>        | ND | 4  | 4  | ND | ND | 1  | ND |
| <i>T. rossicum</i>          | 10 | 1  | 9  | 1  | 9  | 1  | 1  |
| <i>T. semiorbis</i>         | 5  | 1  | 1  | 1  | 1  | 1  | 1  |
| <i>T. seppoi</i>            | 1  | 1  | 1  | 1  | 1  | 1  | 1  |
| <i>T. silvae-virgineae</i>  | 3  | 2  | ND | 1  | ND | ND | ND |
| <i>T. simmonsii</i>         | 26 | 1  | 2  | 1  | 1  | 1  | 1  |
| <i>T. spinulosum</i>        | 2  | 1  | 1  | 1  | 1  | 1  | 1  |
| <i>T. stipitatum</i>        | 1  | 3  | 1  | 1  | 1  | 1  | 1  |
| <i>T. stromaticum</i>       | 10 | 1  | 9  | 1  | 9  | 1  | 1  |
| <i>T. subalpinum</i>        | ND | 1  | 1  | ND | ND | 1  | ND |
| <i>T. subeffusum</i>        | 2  | 1  | 1  | 1  | 1  | 1  | 1  |
| <i>T. thelephoricola</i>    | 1  | 8  | 7  | 1  | 1  | 5  | 1  |
| <i>T. theobromicola</i>     | 39 | 1  | 2  | 1  | 2  | 1  | 1  |

|                        |   |   |   |   |   |   |   |
|------------------------|---|---|---|---|---|---|---|
| <i>T. tremelloides</i> | 1 | 1 | 1 | 1 | 1 | 1 | 1 |
| <i>T. turrialbense</i> | 7 | 1 | 2 | 1 | 2 | 1 | 1 |
| <i>T. victoriense</i>  | 4 | 1 | 3 | 1 | 3 | 1 | 1 |

---

Notes: The number means the candidate counts when retrieved by a nucleotide marker.

**Table 2** Unidentified *Trichoderma* species through nucleotide markers with default retrieval parameters

| Species                  | ITS         | TEF1         | RPB2        | ITS+TEF1 | ITS+RPB2 | TEF1+RPB2 | ITS+TEF1+RPB2 |
|--------------------------|-------------|--------------|-------------|----------|----------|-----------|---------------|
| <i>T. afroharzianum</i>  | 27          | 1(0.5C)      | 4           | 1        | 3        | 1         | 1             |
| <i>T. aggressivum</i>    | 24          | 1(100I)      | 1(100I)     | 1        | 1        | 1         | 1             |
| <i>T. americanum</i>     | 4           | 0            | 1(99I+0.6C) | 0        | 1        | 0         | 0             |
| <i>T. andinense</i>      | ND          | 1(96I)       | 1(0.7C)     | ND       | ND       | 1         | ND            |
| <i>T. appalachiense</i>  | 51          | 1(99I)       | ND          | 1        | ND       | ND        | ND            |
| <i>T. atlanticum</i>     | 8           | 1(98I)       | 5           | 1        | 3        | 1         | 1             |
| <i>T. atrobrunneum</i>   | 27          | 1(0.5C)      | 7           | 1        | 5        | 1         | 1             |
| <i>T. austriacum</i>     | 1(100I)     | 3            | ND          | 1        | ND       | ND        | ND            |
| <i>T. austrokonigii</i>  | 48          | 1(93I)       | 1(96I)      | 1        | 1        | 1         | 1             |
| <i>T. camerunense</i>    | 22          | 1(98I)       | ND          | 1        | ND       | ND        | ND            |
| <i>T. caribbaeum</i>     | 51          | 1(99I +0.3C) | 9           | 1        | 8        | 1         | 1             |
| <i>T. catoptron</i>      | ND          | 1(0.7C)      | 2           | ND       | ND       | 1         | ND            |
| <i>T. chlorosporum</i>   | ND          | 10           | 1(99I)      | ND       | ND       | 1         | ND            |
| <i>T. citrinum</i>       | 8           | 0            | 4           | 0        | 4        | 0         | 0             |
| <i>T. compactum</i>      | ND          | 1(0.1C)      | ND          | ND       | ND       | ND        | ND            |
| <i>T. crassum</i>        | 22          | 0            | 3           | 0        | 2        | 0         | 0             |
| <i>T. cremeoides</i>     | ND          | 2(99I)       | 4(99I)      | ND       | ND       | 1         | ND            |
| <i>T. cremeum</i>        | ND          | 3(98I)       | 3(99I)      | ND       | ND       | 2         | ND            |
| <i>T. dingleyae</i>      | 49          | 1(0.4C)      | 9           | 1        | 8        | 1         | 1             |
| <i>T. dorotheae</i>      | ND          | 1(98I)       | 9           | ND       | ND       | 1         | ND            |
| <i>T. effusum</i>        | 0           | 0            | ND          | 0        | ND       | ND        | ND            |
| <i>T. estonicum</i>      | 3           | 11           | 1(99I)      | 2        | 1        | 1         | 1             |
| <i>T. eucorticioides</i> | 1           | 0            | 1           | 0        | 1        | 0         | 0             |
| <i>T. europaeum</i>      | ND          | 1(98I)       | 4           | ND       | ND       | 1         | ND            |
| <i>T. fertile</i>        | ND          | 1(98I)       | 2           | ND       | ND       | 1         | ND            |
| <i>T. flaviconidium</i>  | 1(99I+0.3C) | 1            | ND          | 1        | ND       | ND        | ND            |
| <i>T. floccosum</i>      | ND          | 7(96I)       | 4           | ND       | ND       | 1         | ND            |
| <i>T. ghanense</i>       | ND          | 1(0.5C)      | 1           | ND       | ND       | 1         | ND            |
| <i>T. hamatum</i>        | 19          | 0            | 1(98I+0.3C) | 0        | 1        | 0         | 0             |
| <i>T. helicum</i>        | ND          | 1(86I)       | 1(0.7C)     | ND       | ND       | 1         | ND            |
| <i>T. hispanicum</i>     | 51          | 1(98I)       | ND          | 1        | ND       | ND        | ND            |
| <i>T. istrianum</i>      | ND          | 1(99I)       | 8           | ND       | ND       | 1         | ND            |
| <i>T. koningiopsis</i>   | 51          | 1(96I)       | 2(0.7C)     | 1        | 2        | 1         | 1             |
| <i>T. lacuwombatense</i> | ND          | 1(0.3C)      | 4(0.7C)     | ND       | ND       | 1         | ND            |
| <i>T. mediterraneum</i>  | ND          | 1(98I)       | 5           | ND       | ND       | 1         | ND            |
| <i>T. mienum</i>         | 2           | 1(0.6C)      | 1(0.5C)     | 1        | 1        | 1         | 1             |
| <i>T. minutisporum</i>   | ND          | 1(98I)       | 5           | ND       | ND       | 1         | ND            |
| <i>T. oblongisporum</i>  | ND          | 0            | 1(98I)      | ND       | ND       | 0         | ND            |
| <i>T. olivascens</i>     | ND          | 1(98I)       | 16          | ND       | ND       | 1         | ND            |
| <i>T. oligosporum</i>    | 1(91I)      | 1(96I)       | 1           | 1        | 1        | 1         | 1             |
| <i>T. orientale</i>      | ND          | 1(96I+0.4C)  | 4           | ND       | ND       | 1         | ND            |



|                             |         |             |             |    |    |    |    |
|-----------------------------|---------|-------------|-------------|----|----|----|----|
| <i>T. parapoluliferum</i>   | 8       | 1           | 0           | 1  | 0  | 0  | 0  |
| <i>T. parareesei</i>        | ND      | 1(0.5C)     | 2(0.7C)     | ND | ND | 1  | ND |
| <i>T. parestonicum</i>      | 3       | 1(99I)      | 3           | 1  | 3  | 1  | 1  |
| <i>T. peltatum</i>          | 1       | 1(96I)      | 1(0.7C)     | 1  | 1  | 1  | 1  |
| <i>T. petersenii</i>        | 51      | 9(96I+0.3C) | 7           | 1  | 7  | 1  | 1  |
| <i>T. pezizoides</i>        | 0       | 0           | 0           | ND | ND | ND | ND |
| <i>T. phyllostachydis</i>   | ND      | 1(0.4C)     | 1(0.7C)     | ND | ND | 1  | ND |
| <i>T. polysporum</i>        | ND      | 1(96)       | 2(96I)      | ND | ND | 1  | ND |
| <i>T. priscilae</i>         | ND      | 1(100I)     | 4(99I)      | ND | ND | 1  | ND |
| <i>T. protopulvinatum</i>   | ND      | 1(98I)      | 4           | ND | ND | 1  | ND |
| <i>T. pseudokoningii</i>    | 14      | 1(0.6C)     | 0           | 1  | 0  | 0  | 0  |
| <i>T. pseudonigrovirens</i> | ND      | 0           | 1           | ND | ND | 0  | ND |
| <i>T. pseudostramineum</i>  | 0       | 0           | 0           | 0  | 0  | 0  | 0  |
| <i>T. psychrophilum</i>     | 2       | 1(0.4C)     | 1(0.7C)     | 1  | 1  | 1  | 1  |
| <i>T. pubescens</i>         | 21      | 0           | 1           | 0  | 1  | 0  | 0  |
| <i>T. reesei</i>            | 15      | 1(0.6C)     | 2(0.2C)     | 1  | 2  | 1  | 1  |
| <i>T. rifaii</i>            | 10(99I) | 3           | ND          | 2  | ND | ND | ND |
| <i>T. rodmanii</i>          | 9       | 1(0.4C)     | 1(0.6C)     | 1  | 1  | 1  | 1  |
| <i>T. rogersonii</i>        | 41      | 1(0.4C)     | 1           | 1  | 1  | 1  | 1  |
| <i>T. rufobrunneum</i>      | 1(100I) | 2           | 9           | 1  | 1  | 2  | 1  |
| <i>T. samuelsii</i>         | 50      | 1(98I)      | 18          | 1  | 16 | 1  | 1  |
| <i>T. saturnisporopsis</i>  | ND      | ND          | 1(99I+0.6C) | ND | ND | ND | ND |
| <i>T. saturnisporum</i>     | ND      | 1(0.6C)     | 1           | ND | ND | 1  | ND |
| <i>T. sempervirentis</i>    | ND      | 1(99I)      | 18          | ND | ND | 1  | ND |
| <i>T. sinense</i>           | ND      | 1(0.5C)     | 1(0.6C)     | ND | ND | 1  | ND |
| <i>T. sinoluteum</i>        | 1       | 1(96I)      | 2           | 1  | 1  | 1  | 1  |
| <i>T. sinuosum</i>          | 4       | 1(100I)     | 1(99I)      | 1  | 1  | 1  | 1  |
| <i>T. spirale</i>           | 21      | 1(0.4C)     | 1           | 1  | 1  | 1  | 1  |
| <i>T. stilbohypoxyli</i>    | 37      | 1(96I+0.4C) | 1(0.7C)     | 1  | 1  | 1  | 1  |
| <i>T. stramineum</i>        | 20      | 0           | 1           | 0  | 1  | 0  | 0  |
| <i>T. strigosellum</i>      | 49      | 1(95I)      | 2           | 1  | 2  | 1  | 1  |
| <i>T. strigosum</i>         | 46      | 1(0.6C)     | 1(0.7C)     | 1  | 1  | 1  | 1  |
| <i>T. trixiae</i>           | 46      | 1(99I)      | 18          | 1  | 16 | 1  | 1  |
| <i>T. vinosum</i>           | 51      | 2(98I)      | 1(99I)      | 2  | 1  | 1  | 1  |
| <i>T. viridarium</i>        | ND      | 1(98I)      | 20          | ND | ND | 1  | ND |
| <i>T. viride</i>            | 40      | 0           | 1(98I)      | 0  | 1  | 0  | 0  |
| <i>T. viridescens</i>       | ND      | 1(99I)      | 19          | ND | ND | 1  | ND |
| <i>T. viridialbum</i>       | ND      | 1(99I)      | 18          | ND | ND | 1  | ND |
| <i>T. virilente</i>         | ND      | 1(99I)      | 11          | ND | ND | 1  | ND |
| <i>T. voglmayrii</i>        | ND      | 1           | 1(0.5C)     | ND | ND | 1  | ND |

Note: 1(96I+0.4C) means there is 1 candidate when retrieved by changing the parameter to 96% Identify and 0.4 Coverage. The numbers in green color mean the corresponding sequences belong to type 1, testing sequences share regional overlap with the database sequences. The numbers in orange color mean the corresponding sequences belong to type 2, testing sequences share less regional overlap with the database sequences and are not component

for identification. The number in red color mean the corresponding sequences belong to type 3, testing sequences show unknown errors. Others notes are same with Table 1.

**Table 3** Misidentified *Trichoderma* species through nucleotide markers with default retrieval parameters

| Species                   | ITS       | TEF1        | RPB2      | ITS+TEF1 | ITS+RPB2 | TEF1+RPB2 | ITS+TEF1+RPB2 |
|---------------------------|-----------|-------------|-----------|----------|----------|-----------|---------------|
| <i>T. barbatum</i>        | 10        | <u>1</u>    | 1(99I)    | <u>1</u> | 1        | 0         | 0             |
| <i>T. ceraceum</i>        | ND        | <u>3</u>    | 1(98I)    | ND       | ND       | 0         | ND            |
| <i>T. cerinum</i>         | ND        | 1(99I+0.3C) | <u>2</u>  | ND       | ND       | 0         | ND            |
| <i>T. composticola</i>    | 47        | 1(0.4C)     | <u>5</u>  | 1        | <u>5</u> | 0         | 0             |
| <i>T. corneum</i>         | ND        | <u>1</u>    | <u>11</u> | ND       | ND       | <u>1</u>  | ND            |
| <i>T. crystalligenum</i>  | <u>1</u>  | 0           | <u>1</u>  | 0        | <u>1</u> | 0         | 0             |
| <i>T. deliquescens</i>    | 4         | <u>1</u>    | 2         | <u>1</u> | 2        | <u>1</u>  | <u>1</u>      |
| <i>T. koningii</i>        | 49        | 1           | <u>1</u>  | 1        | <u>1</u> | 0         | 0             |
| <i>T. lentiforme</i>      | 24        | 1(96I)      | <u>3</u>  | 1        | <u>2</u> | 0         | 0             |
| <i>T. lixii</i>           | 24        | <u>2</u>    | ND        | 0        | ND       | ND        | ND            |
| <i>T. longibrachiatum</i> | 15        | <u>1</u>    | 3         | 0        | 1        | <u>1</u>  | 0             |
| <i>T. neosinense</i>      | 48        | 0           | <u>4</u>  | 0        | <u>4</u> | 0         | <u>2</u>      |
| <i>T. neotropicale</i>    | <u>22</u> | 1(90I)      | ND        | 0        | ND       | ND        | ND            |
| <i>T. paraviridescens</i> | 46        | 1(0.4C)     | <u>4</u>  | 1        | <u>4</u> | 0         | 0             |
| <i>T. pulvinatum</i>      | 4         | <u>1</u>    | <u>3</u>  | <u>1</u> | <u>3</u> | <u>1</u>  | <u>1</u>      |
| <i>T. strictipile</i>     | ND        | <u>8</u>    | <u>1</u>  | ND       | ND       | 0         | ND            |
| <i>T. sulphureum</i>      | ND        | <u>1</u>    | 1(99I)    | ND       | ND       | 0         | ND            |
| <i>T. tawa</i>            | ND        | 0           | <u>1</u>  | ND       | ND       | 0         | ND            |
| <i>T. tomentosum</i>      | 24        | <u>4</u>    | 1(98I)    | <u>2</u> | 1        | <u>1</u>  | <u>1</u>      |
| <i>T. virens</i>          | 21        | <u>9</u>    | 1(99I)    | <u>1</u> | 1        | <u>1</u>  | <u>0</u>      |

Note: The numbers in underling and bold mean the retrieval candidates do not contain the right *Trichoderma* species. Others notes are the same with Table 1.
